# Supplementary material
Source: PubMed Central journal article supplement (PMC5799877)
Supplement: es7b05138_si_001.pdf [file es7b05138_si_001.pdf]

1 **Supporting information for**

2 **Spatially resolved measurements of CO<sub>2</sub> and CH<sub>4</sub> concentration and gas exchange velocity**  
3 **highly influence carbon emission estimates of reservoirs**

4  
5 José R. Paranaíba,<sup>‡</sup> Nathan Barros,<sup>‡</sup> Raquel Mendonça,<sup>‡,†</sup> Annika Linkhorst,<sup>†</sup> Anastasija  
6 Isidorova,<sup>†</sup> Fábio Roland,<sup>‡</sup> Rafael M. Almeida,<sup>‡</sup> and Sebastian Sobek<sup>†</sup>

7  
8 <sup>‡</sup> Institute of Biological Sciences, Federal University of Juiz de Fora, Minas Gerais,  
9 36036-900, Brazil

10 <sup>†</sup> Department of Ecology and Genetics, Limnology, Uppsala University, Uppsala,  
11 75236, Sweden

12  
13 **Supporting information**

14 The supporting information has 14 pages, with 10 figures and 3 tables.

23 **Experimental section**

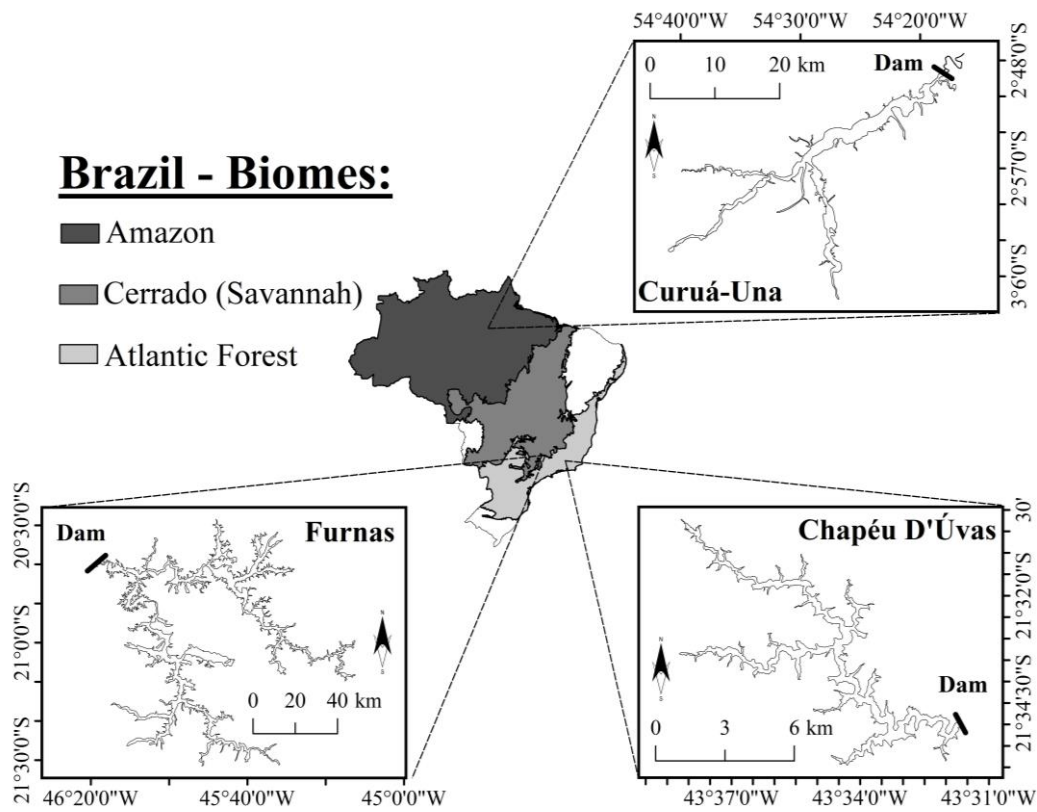

24

25 **Figure S1:** Location of the studied reservoirs. Source: Instituto Brasileiro de Geografia  
26 e Estatística (IBGE), 2017.

27

28

29

30

31

32

33

34

35

36

37

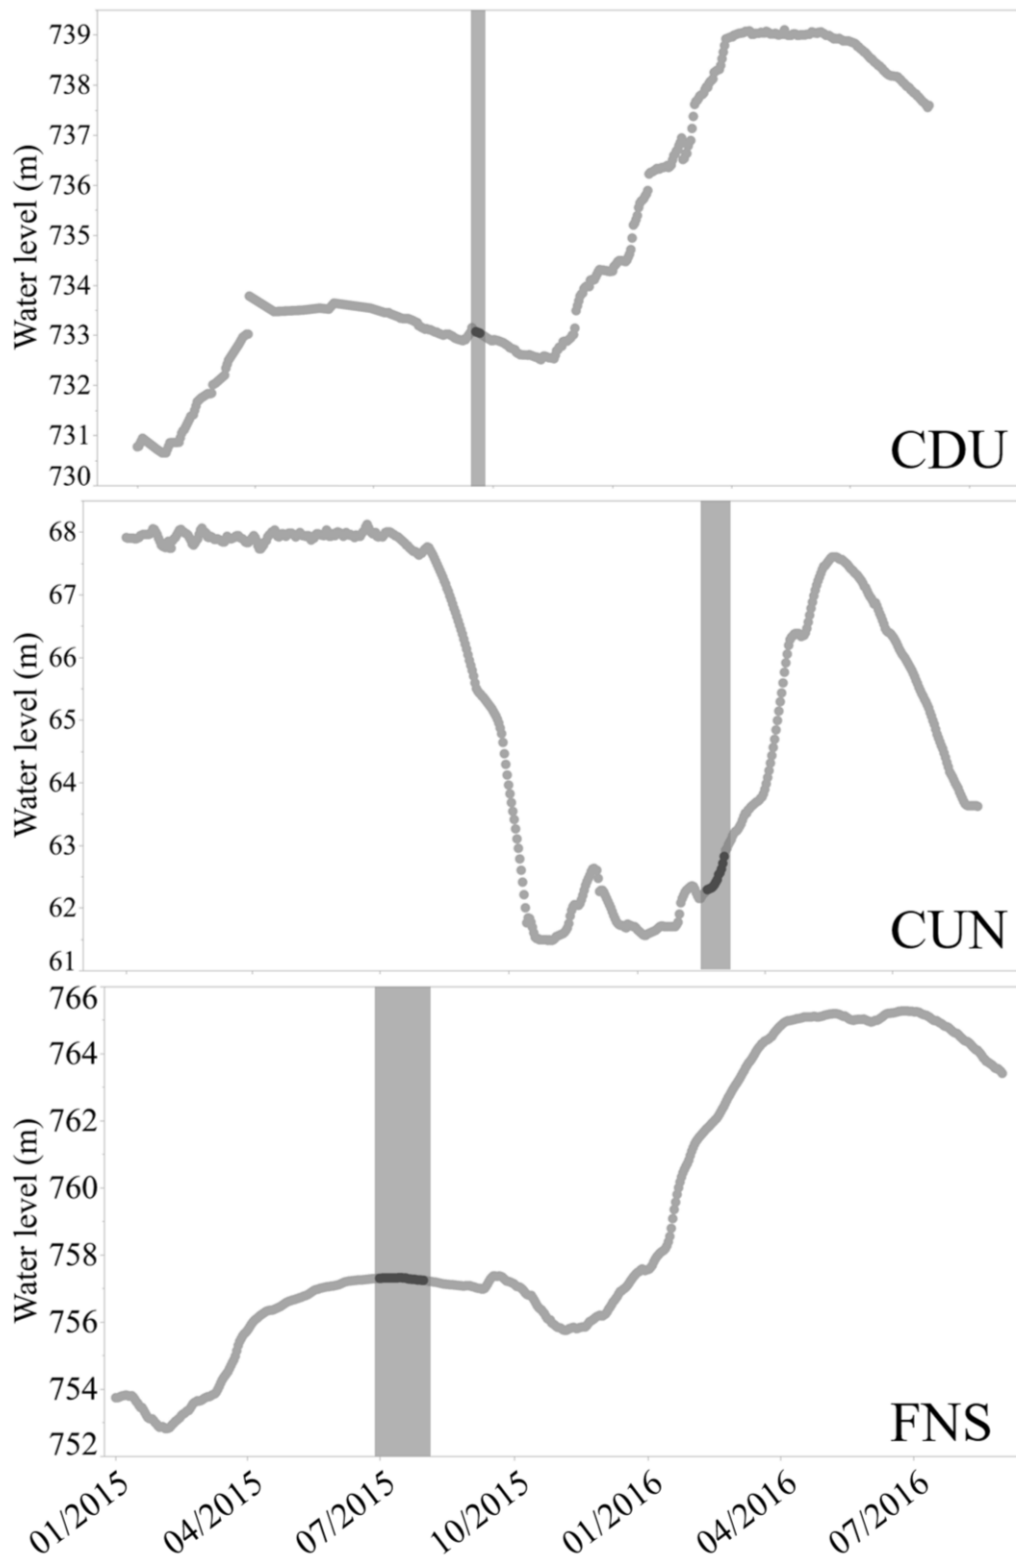

39

40 **Figure S2:** Water level fluctuation in CDU, CUN and FNS. The gray boxes indicate  
 41 fieldwork periods.

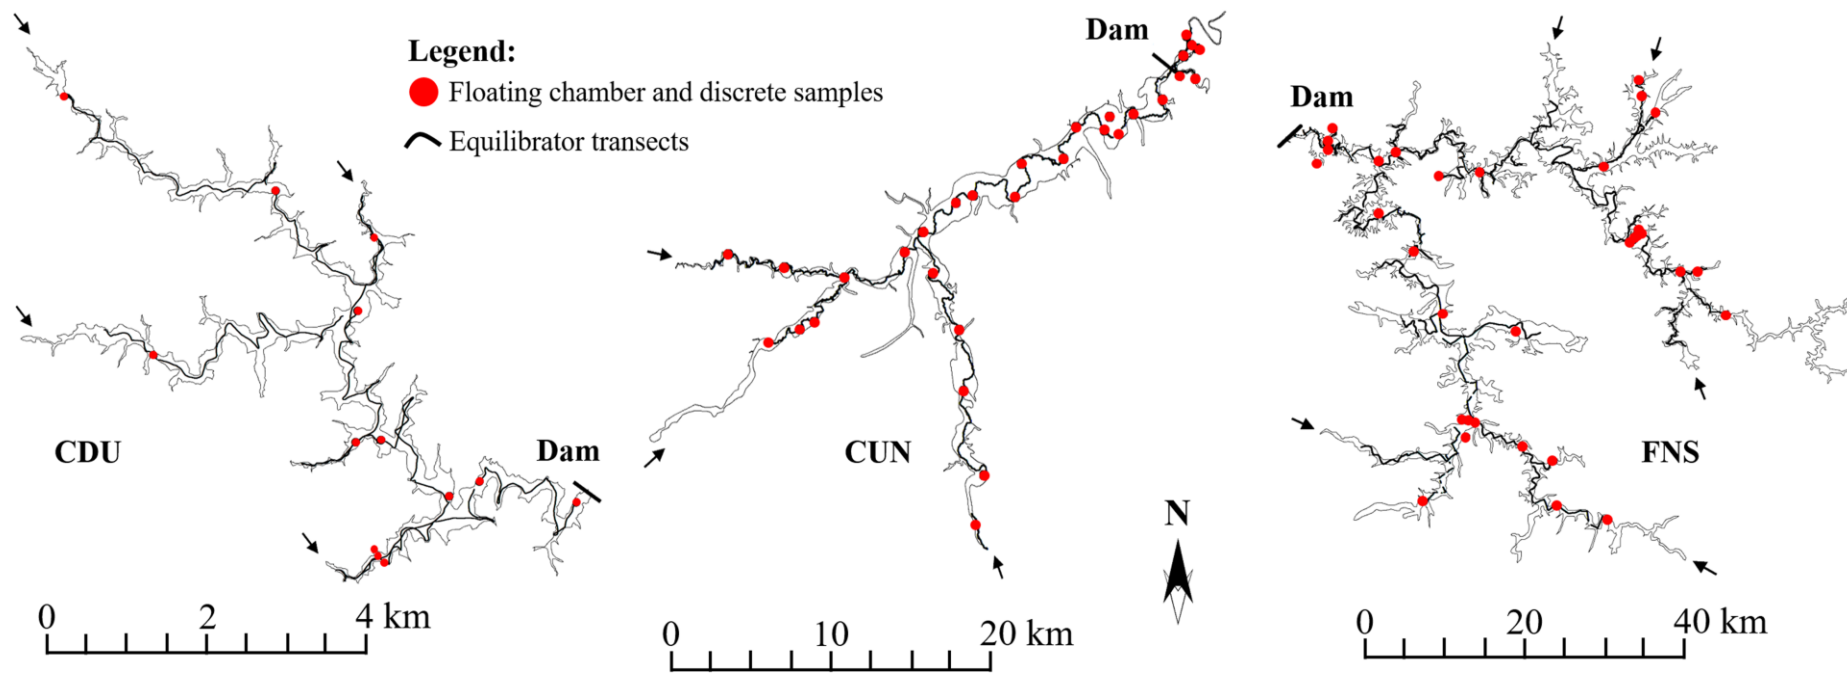

42

43 **Figure S3:** Sampling strategy performed in CDU, CUN and FNS. The solid black line shows the travelled boat transects during equilibrator-  
 44 based on-line measurement of  $p\text{CO}_2$  and  $p\text{CH}_4$ , and the red circles shows locations of floating chamber and other discrete sample measurements.

45 **Results**

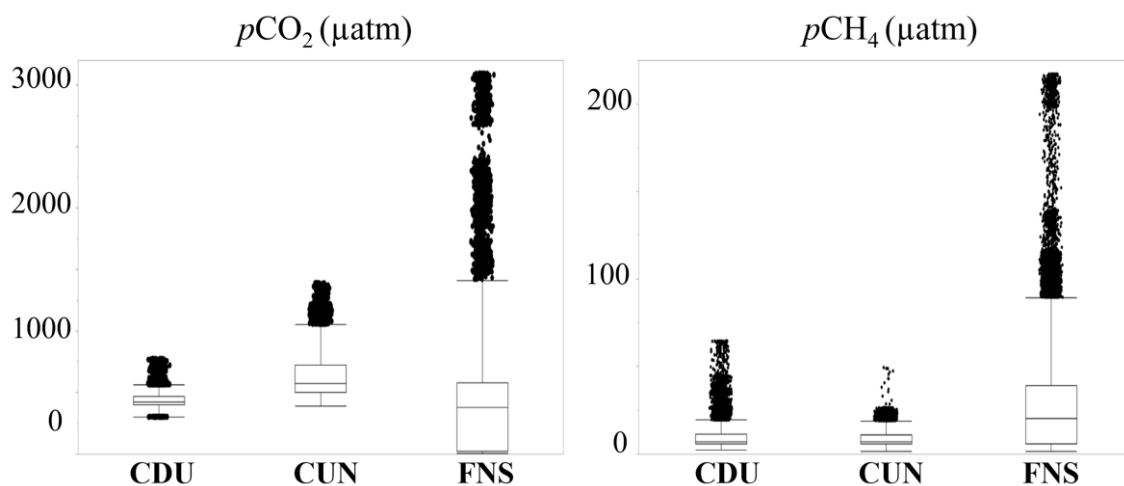

46

47 **Figure S4:** Box plot of  $p\text{CO}_2$  and  $p\text{CH}_4$  ( $\mu\text{atm}$ ) from equilibrators-based measurements  
48 of CDU, CUN and FNS reservoirs. Average of atmospheric equilibrium of  $p\text{CO}_2$  and  
49  $p\text{CH}_4$  were 399  $\mu\text{atm}$  and 1.8  $\mu\text{atm}$ , respectively, in all reservoirs.

50

51

52

53

54

55

56

57

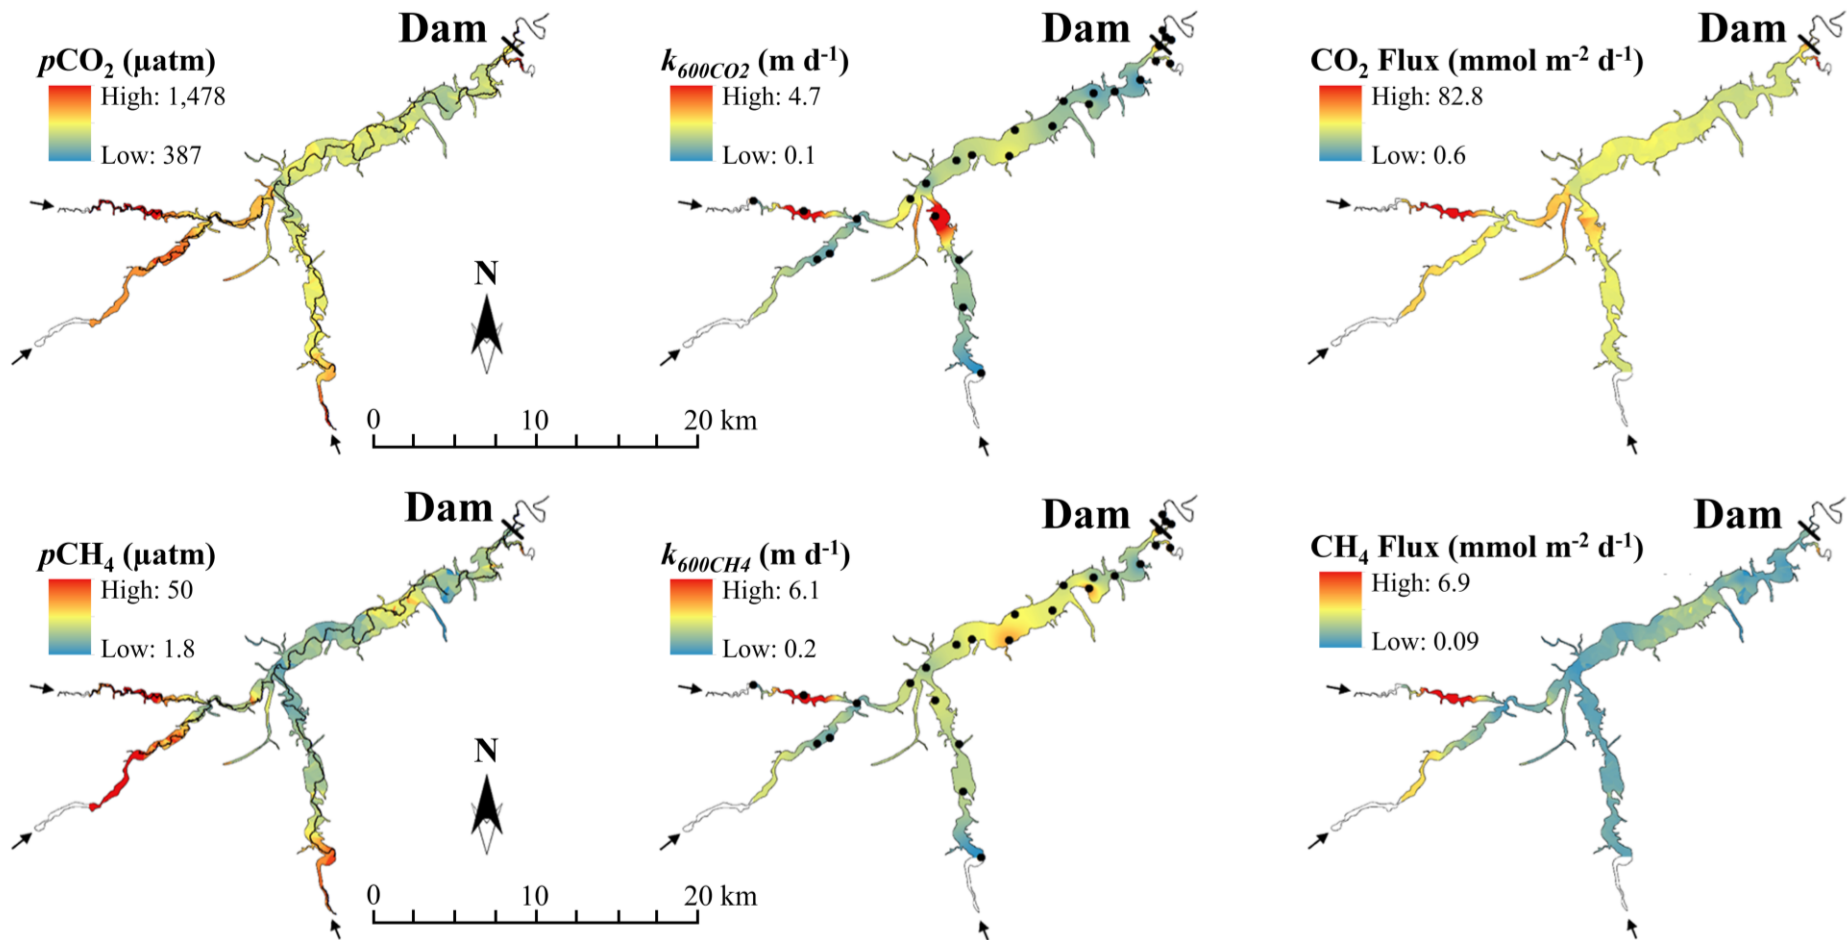

58

59

60

61

**Figure S5:**  $p\text{CO}_2$  and  $p\text{CH}_4$  ( $\mu\text{atm}$ ),  $k_{600\text{CO}_2}$  and  $k_{600\text{CH}_4}$  ( $\text{m d}^{-1}$ ), and diffusive flux of  $\text{CO}_2$  and  $\text{CH}_4$  ( $\text{mmol m}^{-2} \text{d}^{-1}$ ) from IDW interpolation in CUN. The black arrows on the maps indicate river entrances. The black lines represent the equilibrator transects and each black dots represent three measurements of floating chamber and discrete sample.

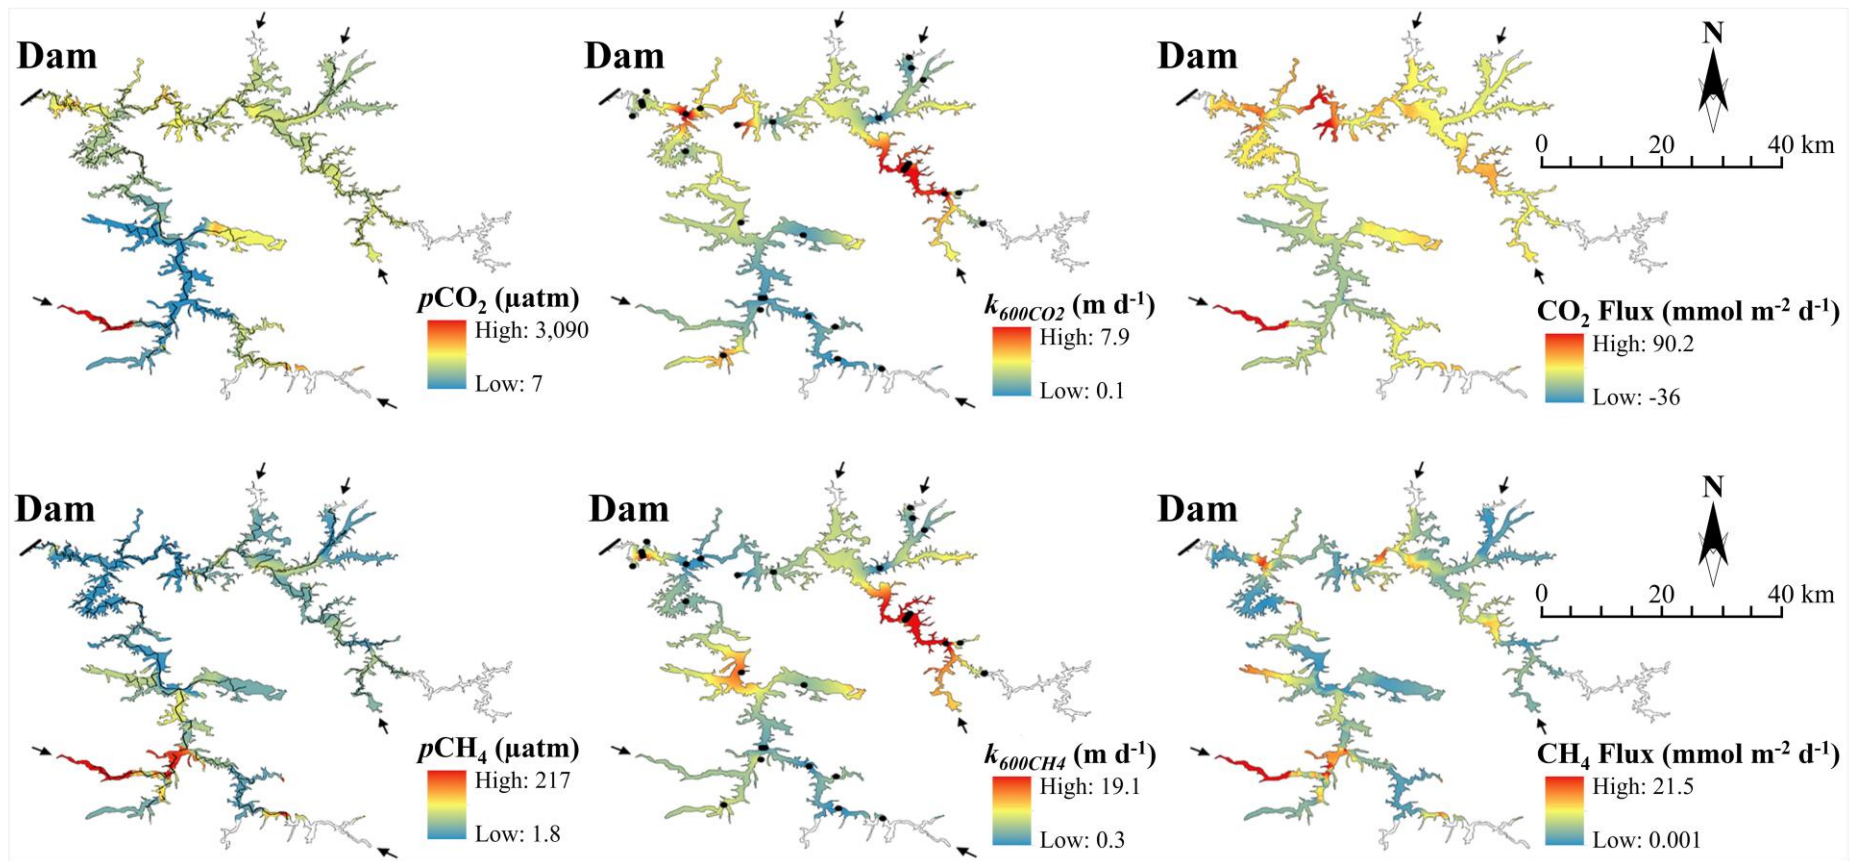

62

63

64

65

**Figure S6:**  $p\text{CO}_2$  and  $p\text{CH}_4$  ( $\mu\text{atm}$ ),  $k_{600\text{CO}_2}$  and  $k_{600\text{CH}_4}$  ( $\text{m d}^{-1}$ ), and diffusive flux of  $\text{CO}_2$  and  $\text{CH}_4$  ( $\text{mmol m}^{-2} \text{d}^{-1}$ ) from IDW interpolation in FNS. The black arrows on the maps indicate river entrances. The black lines represent the equilibrator transects and each black dots represent three measurements of floating chamber and discrete sample.

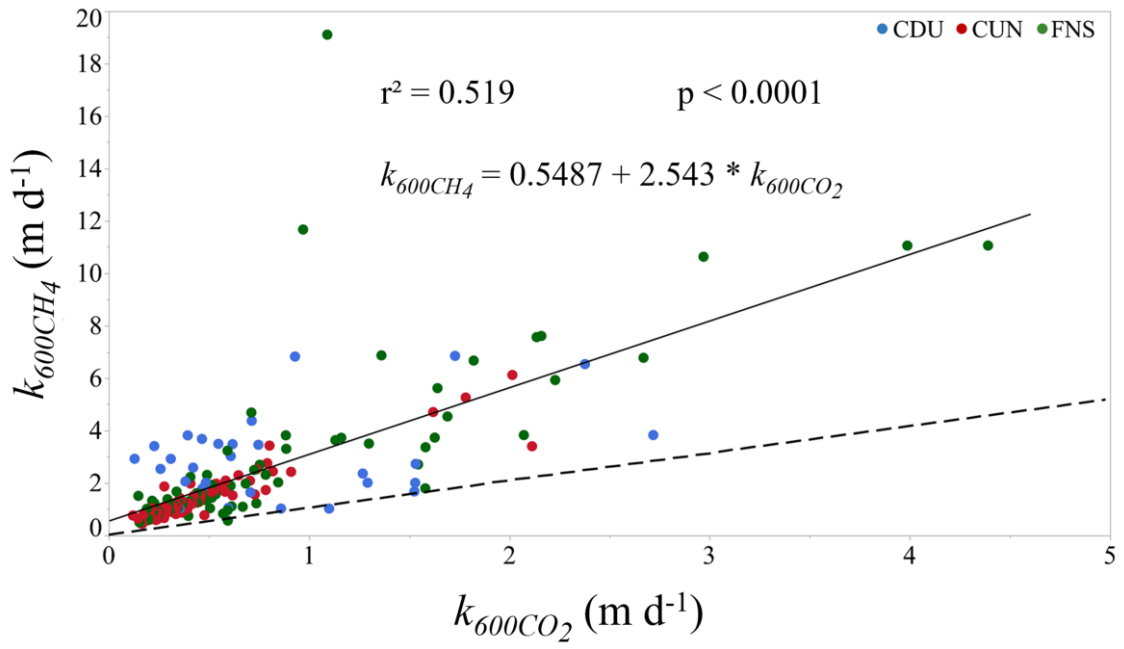

66

67 **Figure S7:** Relationship between the gas exchange velocity calculated from diffusive  
 68 CH<sub>4</sub> flux measurements ( $k_{600CH_4}$ ) and the gas exchange velocity calculated from  
 69 diffusive CO<sub>2</sub> flux measurements ( $k_{600CO_2}$ ) for CDU, CUN and FNS. The dashed line  
 70 represents the 1:1 line. Every point represents the mean of 3 chamber deployments at  
 71 each measurement location.

72

73



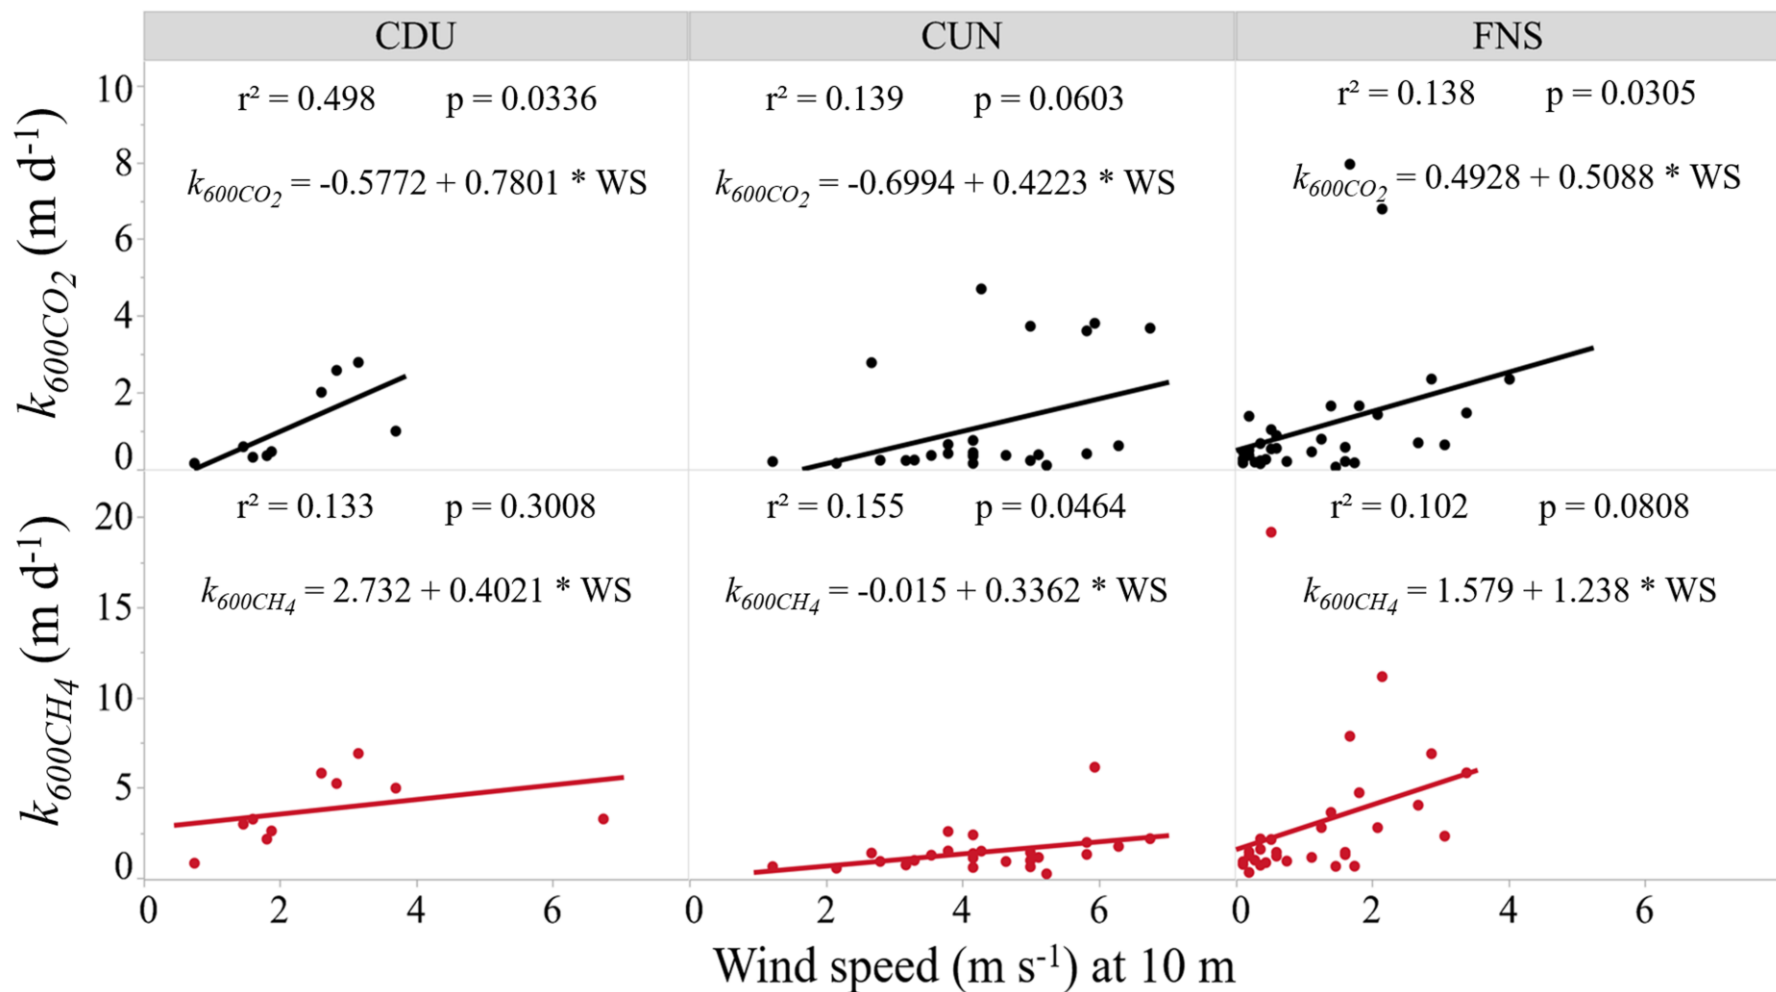

74

75 **Figure S8:** Relationship between wind speed and  $k_{600CO_2}$  and  $k_{600CH_4}$  measured by floating chambers. Every point represents the mean of 3

76 chamber deployments at each measurement location.

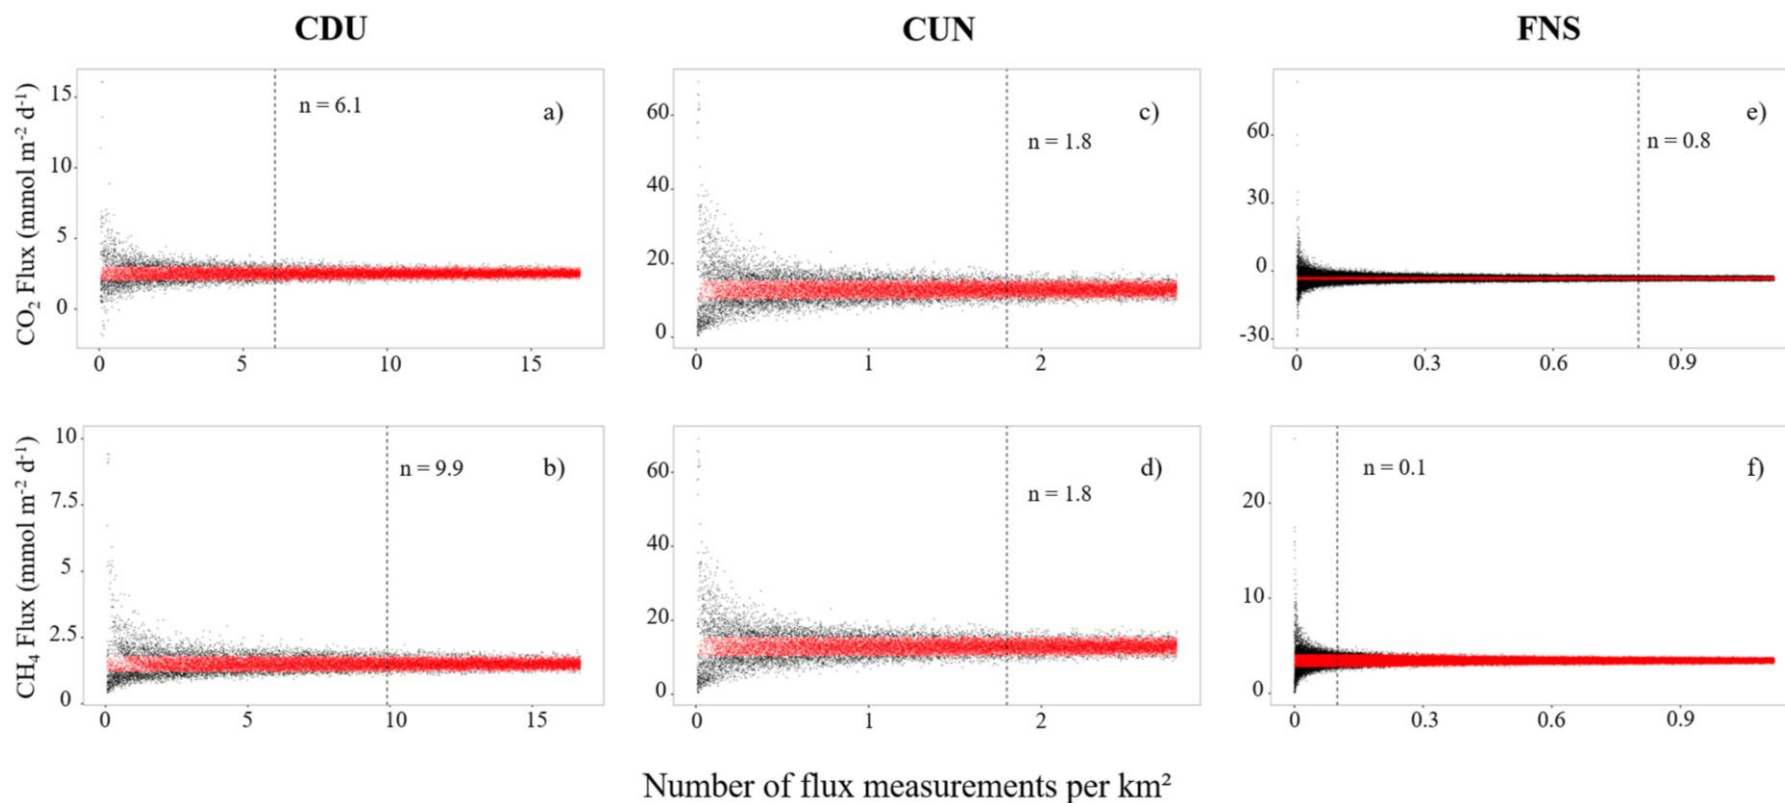

77

78 **Figure S9:** Downsampling simulations to predict how many flux measurements per km<sup>2</sup> would have been enough to reach total flux estimates  
 79 within ± 20% of our observed mean for each gas in each reservoir (a, b: CDU; c, d: CUN; e, f: FNS). The points inside the red area represent  
 80 those estimates that fell within the ± 20% criteria. The vertical dashed line indicates the minimum sampling effort per km<sup>2</sup> to reach a probability  
 81 of 95% of falling within the ± 20% criteria.

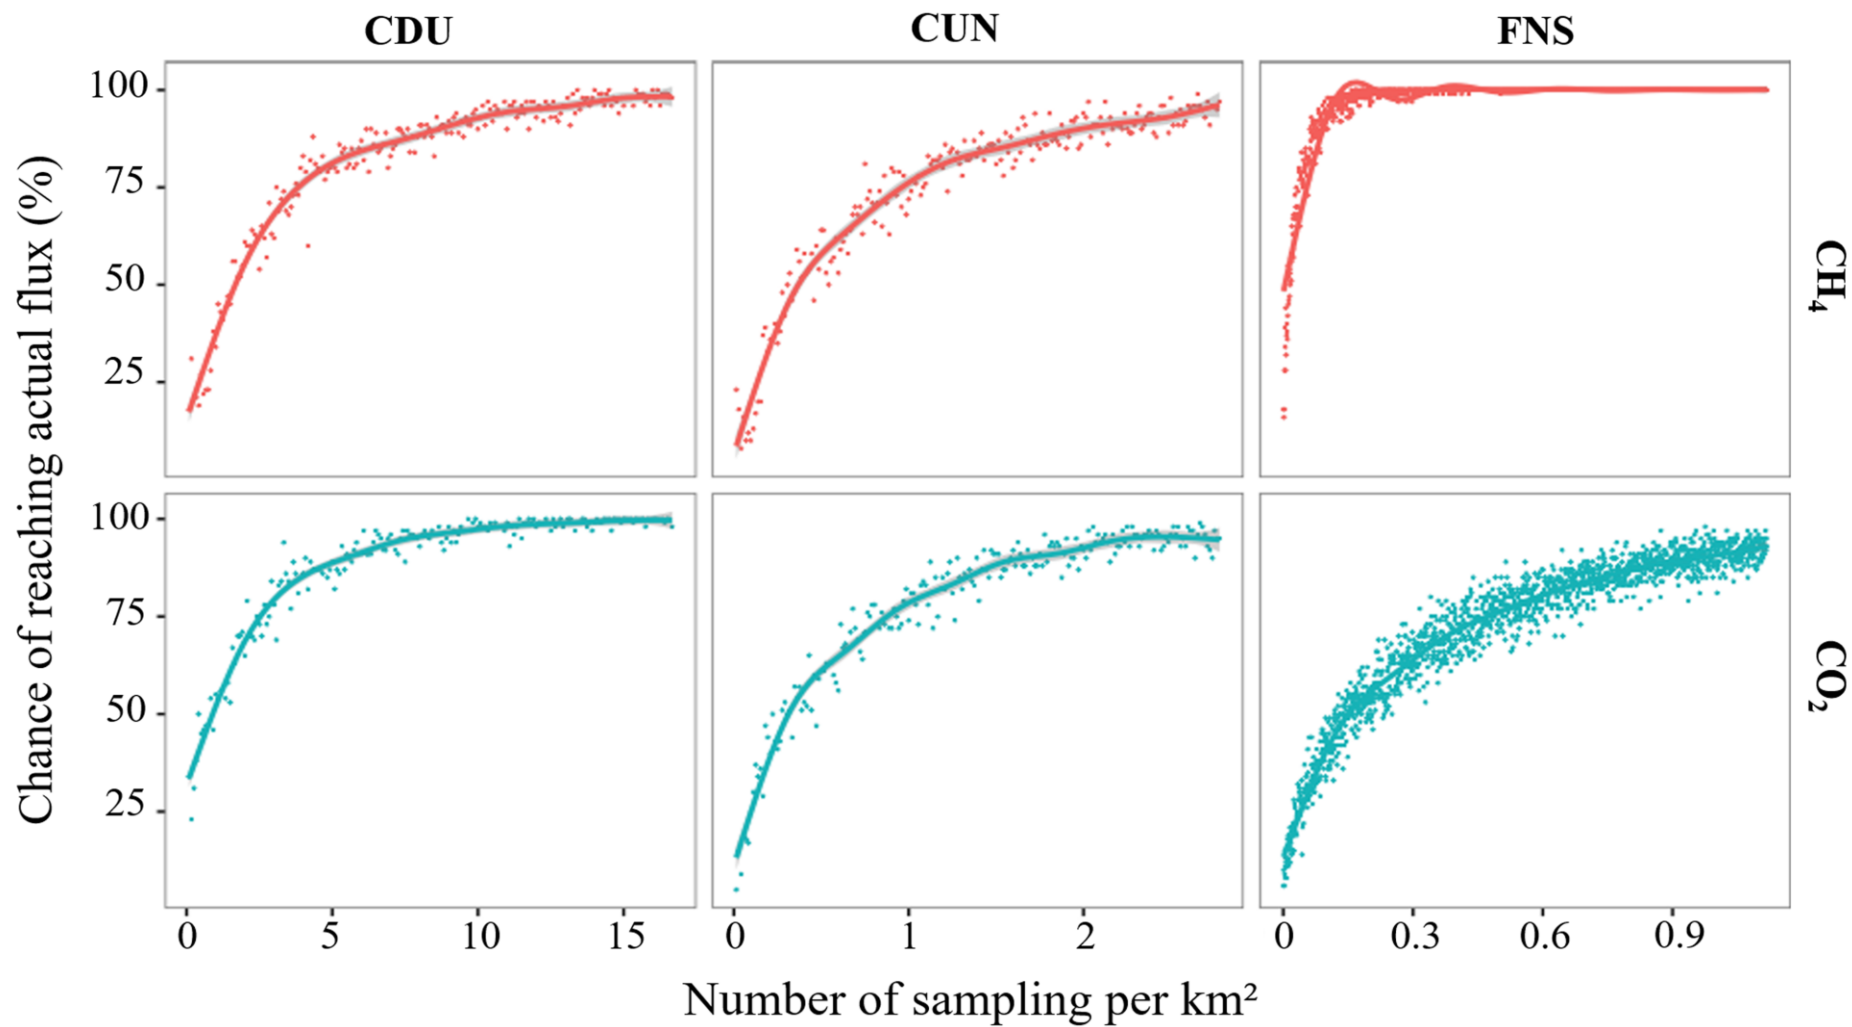

82

83 **Figure S10:** Chance of reaching a whole-system mean flux within  $\pm 20\%$  of our observed mean flux (i.e., considering the entire dataset) for a  
 84 given number of flux measurements randomly distributed across the reservoir.

85 **Table S1:** Descriptive statistics of  $p\text{CO}_2$  and  $p\text{CH}_4$ , TOC concentration, wind speed and  
 86 the gas exchange velocity calculated from  $\text{CO}_2$  flux ( $k_{600\text{CO}_2}$ ) and  $\text{CH}_4$  flux ( $k_{600\text{CH}_4}$ ).

|                                                                         | <b>Reservoirs</b> |               |               |
|-------------------------------------------------------------------------|-------------------|---------------|---------------|
|                                                                         | <b>CDU</b>        | <b>CUN</b>    | <b>FNS</b>    |
| $p\text{CO}_2$ ( $\mu\text{atm}$ )                                      | 439 $\pm$ 63      | 664 $\pm$ 221 | 400 $\pm$ 299 |
| <i>median</i>                                                           | 423               | 587           | 380           |
| $p\text{CH}_4$ ( $\mu\text{atm}$ )                                      | 11 $\pm$ 9        | 9 $\pm$ 5     | 30 $\pm$ 20   |
| <i>median</i>                                                           | 7                 | 7             | 20            |
| <b>Coefficient of variation of <math>p\text{CO}_2</math></b>            | 0.1               | 0.3           | 0.8           |
| <b>Coefficient of variation of <math>p\text{CH}_4</math></b>            | 0.8               | 0.5           | 0.7           |
| <b>TOC - main tributary (mg C L<sup>-1</sup>)<sup>a</sup></b>           | 3.2 $\pm$ 0.5     | 4.3 $\pm$ 0.8 | 3.5 $\pm$ 0.4 |
| <i>median</i>                                                           | 3                 | 4             | 2.8           |
| <b>TOC - reservoir before the dam (mg C L<sup>-1</sup>)<sup>a</sup></b> | 1.1 $\pm$ 0.3     | 2.1 $\pm$ 1   | 1.4 $\pm$ 0.2 |
| <i>median</i>                                                           | 0.8               | 1.8           | 1             |
| <b>Wind speed at 10 m (m s<sup>-1</sup>)</b>                            | 2.7 $\pm$ 2.4     | 4.4 $\pm$ 2   | 1.3 $\pm$ 2.1 |
| <i>median</i>                                                           | 2.4               | 3.8           | 1.4           |
| <b><math>k_{600\text{CO}_2}</math> value (m d<sup>-1</sup>)</b>         | 0.9 $\pm$ 0.6     | 0.5 $\pm$ 0.6 | 1.1 $\pm$ 1.2 |
| <i>median</i>                                                           | 0.5               | 0.4           | 0.6           |
| <b><math>k_{600\text{CH}_4}</math> value (m d<sup>-1</sup>)</b>         | 2.8 $\pm$ 1.6     | 1.4 $\pm$ 1   | 3 $\pm$ 3.3   |
| <i>median</i>                                                           | 3.4               | 1.3           | 1.5           |
| <b><math>k_{600\text{CH}_4}/k_{600\text{CO}_2}</math> ratio</b>         | 3.1               | 2.8           | 2.7           |

<sup>a</sup> This study

87

88

89 **Table S2:** Average of  $k$  values ( $\text{m d}^{-1}$ ) calculated by three different approaches: from  
 90 spatially distributed floating chamber measurements,  $k_{FC}$ ; from floating chamber  
 91 measurements close to the dam,  $k_d$ ; and scaled from wind speed (Cole & Caraco, 1998),  
 92  $k_{ws}$ ; Diffusive fluxes of  $\text{CO}_2$  and  $\text{CH}_4$  ( $\text{mmol m}^{-2} \text{d}^{-1}$ ) and limnological parameters  
 93 expressed as average  $\pm$  standard deviation and range. (n.a. represents “not analyzed”).

|                                                                     | <b>CDU</b>                      | <b>CUN</b>                       | <b>FNS</b>                        |
|---------------------------------------------------------------------|---------------------------------|----------------------------------|-----------------------------------|
| <b><math>k_{FC-CO_2}</math> (<math>\text{m d}^{-1}</math>)</b>      | 2.2                             | 0.7                              | 1                                 |
| <b><math>k_{FC-CH_4}</math> (<math>\text{m d}^{-1}</math>)</b>      | 4                               | 1.9                              | 4.5                               |
| <b><math>k_d-CO_2</math> (<math>\text{m d}^{-1}</math>)</b>         | 0.3                             | 0.5                              | 0.9                               |
| <b><math>k_d-CH_4</math> (<math>\text{m d}^{-1}</math>)</b>         | 2.4                             | 1.5                              | 3.3                               |
| <b><math>k_{ws-CO_2}</math> (<math>\text{m d}^{-1}</math>)</b>      | 0.8                             | 1.2                              | 0.6                               |
| <b><math>k_{ws-CH_4}</math> (<math>\text{m d}^{-1}</math>)</b>      | 0.8                             | 1.2                              | 0.6                               |
| <b>CO<sub>2</sub> Flux using <math>k_{FC-CO_2}</math></b>           | 4.8 $\pm$ 6<br>(-26.4 - 24.2)   | 7.7 $\pm$ 9.5<br>(0.6 - 83)      | 7.1 $\pm$ 15.8<br>(-36 - 90.2)    |
| <b>CH<sub>4</sub> Flux using <math>k_{FC-CH_4}</math></b>           | 1.7 $\pm$ 1.7<br>(0.04 - 16)    | 0.6 $\pm$ 0.8<br>(0.1 - 7)       | 2.6 $\pm$ 2.5<br>(0.001 - 21.5)   |
| <b>CO<sub>2</sub> Flux using <math>k_d-CO_2</math></b>              | 0.7 $\pm$ 0.7<br>(-0.9 - 4.7)   | 5.5 $\pm$ 3.3<br>(0.9 - 18.5)    | 6.3 $\pm$ 17.3<br>(-14.3 - 102)   |
| <b>CH<sub>4</sub> Flux using <math>k_d-CH_4</math></b>              | 0.9 $\pm$ 0.7<br>(0.4 - 5.4)    | 0.5 $\pm$ 0.2<br>(0.1 - 1.5)     | 2.7 $\pm$ 3.4<br>(0.2 - 29)       |
| <b>CO<sub>2</sub> Flux using <math>k_{ws-CO_2}</math></b>           | 2.1 $\pm$ 2.1<br>(-2.7 - 13.4)  | 13 $\pm$ 8<br>(2.2 - 44.3)       | 4.2 $\pm$ 11.6<br>(-9.7 - 69)     |
| <b>CH<sub>4</sub> Flux using <math>k_{ws-CH_4}</math></b>           | 0.3 $\pm$ 0.2<br>(0.1 - 1.9)    | 0.4 $\pm$ 0.2<br>(0.08 - 1.2)    | 0.5 $\pm$ 0.6<br>(0.04 - 5.5)     |
| <b>Water temperature (<math>^{\circ}\text{C}</math>)</b>            | 24.2 $\pm$ 0.7<br>(22.5 - 27.2) | 30.1 $\pm$ 1.4<br>(27.1 - 37.4)  | 21.3 $\pm$ 0.8<br>(19.5 - 25)     |
| <b>pH</b>                                                           | 7.8 $\pm$ 0.1<br>(7.45 - 8.06)  | 6.1 $\pm$ 0.7<br>(4.5 - 7.25)    | 8.4 $\pm$ 0.9<br>(7.04 - 11)      |
| <b>Conductivity (<math>\mu\text{Sc cm}^{-1}</math>)</b>             | 26.7 $\pm$ 0.6<br>(26 - 29)     | 16 $\pm$ 11<br>(1 - 40.1)        | 32 $\pm$ 16<br>(1 - 58.2)         |
| <b>Chlorophyll <math>a</math> (<math>\mu\text{g L}^{-1}</math>)</b> | 11.5 $\pm$ 15<br>(0.2 - 56)     | n.a.                             | 7 $\pm$ 30.2<br>(0.5 - 270)       |
| <b>Turbidity (NTU)</b>                                              | 19.7 $\pm$ 10.3<br>(7.2 - 88.1) | n.a.                             | 24.6 $\pm$ 12.6<br>(2.7 - 116)    |
| <b>Dissolved oxygen (<math>\text{mg L}^{-1}</math>)</b>             | 8.5 $\pm$ 0.4<br>(8.1 - 9)      | 6.7 $\pm$ 1.9<br>(4.3 - 9.8)     | 7.1 $\pm$ 3.4<br>(5.6 - 12.5)     |
| <b>Dissolved oxygen saturation (%)</b>                              | 102 $\pm$ 1.6<br>(97.8 - 113.2) | 70.1 $\pm$ 12.4<br>(56.4 - 88.9) | 81.1 $\pm$ 36.1<br>(70.4 - 146.3) |

94 **Table S3:** Parameters of PLS models explaining the variability in log<sub>10</sub>-transformed *p*CO<sub>2</sub> and *p*CH<sub>4</sub> in the studied reservoirs. Variable  
95 importance in projection (VIP) describes how much a variable contributes to explaining the Y variable. Highly important variables have VIP>1.0  
96 (marked bold), moderately important variables have VIP 0.8-1.0 (marked italic), and unimportant variables have VIP <0.8. Coefficients and  
97 intercepts correspond to, and can be used analogous to the slopes and intercepts in an ordinary multiple linear regression. Lacking values for  
98 chlorophyll *a* and turbidity were caused by missing data due to instrument failure. (n.a. represents “not analyzed”).

| Reservoir                    | CDU                          |              | CUN                          |              | FNS                          |              | CDU                          |              | CUN                          |              | FNS                          |              |
|------------------------------|------------------------------|--------------|------------------------------|--------------|------------------------------|--------------|------------------------------|--------------|------------------------------|--------------|------------------------------|--------------|
| Model                        | log <i>p</i> CO <sub>2</sub> |              | log <i>p</i> CO <sub>2</sub> |              | log <i>p</i> CO <sub>2</sub> |              | log <i>p</i> CH <sub>4</sub> |              | log <i>p</i> CH <sub>4</sub> |              | log <i>p</i> CH <sub>4</sub> |              |
| Components                   | 7                            |              | 4                            |              | 5                            |              | 3                            |              | 4                            |              | 3                            |              |
| r <sup>2</sup> Y             | 0.65                         |              | 0.83                         |              | 0.77                         |              | 0.79                         |              | 0.65                         |              | 0.44                         |              |
| Q <sup>2</sup>               | 0.65                         |              | 0.83                         |              | 0.77                         |              | 0.79                         |              | 0.65                         |              | 0.44                         |              |
| Parameter                    | VIP                          | Coefficients |
| Date                         | <b>1.11</b>                  | 0.005        | <b>1.13</b>                  | 0.03         | <i>0.83</i>                  | -0.15        | <b>1.72</b>                  | 0.06         | <i>0.92</i>                  | -0.03        | <i>0.86</i>                  | 0.01         |
| Time                         | <b>1.58</b>                  | 0.04         | 0.18                         | 0.01         | <i>0.93</i>                  | -0.16        | 0.53                         | -0.02        | <i>1</i>                     | -0.04        | 0.59                         | -0.06        |
| GPS(S)                       | 0.55                         | 0.003        | 0.67                         | -0.01        | 0.66                         | -0.21        | <b>1.82</b>                  | 0.08         | <b>1.01</b>                  | -0.06        | <b>1.56</b>                  | -0.15        |
| GPS(W)                       | 0.67                         | 0.04         | <b>1.11</b>                  | 0.04         | 0.47                         | -0.03        | <b>1.51</b>                  | -0.05        | <i>0.97</i>                  | -0.02        | 0.71                         | -0.01        |
| Water temperature            | <b>1.03</b>                  | 0.006        | 0.74                         | 0.003        | <i>0.86</i>                  | 0.07         | 0.32                         | 0.01         | <b>1.01</b>                  | -0.03        | 0.56                         | -0.04        |
| pH                           | 0.48                         | -0.005       | <b>1.18</b>                  | -0.01        | <b>1.62</b>                  | -0.39        | 0.43                         | 0.03         | <i>0.98</i>                  | -0.02        | <b>1.21</b>                  | 0.11         |
| Depth                        | <i>0.88</i>                  | -0.01        | <b>1.16</b>                  | -0.02        | 0.56                         | -0.05        | <b>1.56</b>                  | -0.05        | 0.61                         | -0.02        | <b>1.26</b>                  | -0.08        |
| log <i>p</i> CH <sub>4</sub> | 0.75                         | 0.01         | <b>1.23</b>                  | 0.06         | <i>0.86</i>                  | -0.16        | n.a.                         | n.a.         | n.a.                         | n.a.         | n.a.                         | n.a.         |
| log <i>p</i> CO <sub>2</sub> | n.a.                         | n.a.         | n.a.                         | n.a.         | n.a.                         | n.a.         | 0.57                         | -0.002       | <b>1.51</b>                  | 0.15         | <b>1.45</b>                  | -0.21        |
| Conductivity                 | <i>1</i>                     | -0.003       | 0.62                         | -0.01        | 0.73                         | 0.04         | 0.30                         | -0.01        | <i>0.67</i>                  | -0.02        | 0.53                         | -0.01        |
| log Chl <i>a</i>             | 0.6                          | -0.007       | n.a.                         | n.a.         | 0.61                         | 0.06         | 0.45                         | -0.01        | n.a.                         | n.a.         | 0.78                         | 0.01         |
| log Turbidity                | 0.72                         | 0.003        | n.a.                         | n.a.         | 0.41                         | 0.02         | 0.45                         | 0.01         | n.a.                         | n.a.         | <b>1.05</b>                  | 0.02         |
| [O <sub>2</sub> ]            | <b>1.69</b>                  | -0.005       | <b>1.18</b>                  | -0.02        | <b>1.64</b>                  | -0.07        | 0.62                         | 0.04         | <b>1.04</b>                  | 0.03         | <i>0.84</i>                  | -0.07        |
| %O <sub>2</sub> sat          | <b>1.04</b>                  | -0.01        | <b>1.19</b>                  | -0.03        | <b>1.62</b>                  | -0.07        | 0.52                         | 0.02         | <b>1.03</b>                  | 0.05         | <i>0.88</i>                  | -0.07        |
| Intercept                    | 2.63                         |              | 2.79                         |              | 2.1                          |              | 0.93                         |              | 0.91                         |              | 1.31                         |              |
